# Supplementary material for: Molecular Interplay between AURKA and SPOP Dictates CRPC Pathogenesis via Androgen Receptor
Source: Cancers (Basel). 2020 Nov 4;12(11):3247. doi: 10.3390/cancers12113247 (PMC7693105; doi:10.3390/cancers12113247)
Supplement: Supplementary file 1 [file cancers-12-03247-s001.pdf]

# Molecular Interplay between AURKA and SPOP Dictates CRPC Pathogenesis via Androgen Receptor

Kumar Nikhil, Mohini Kamra, Asif Raza, Hanan S. Haymour and Kavita Shah

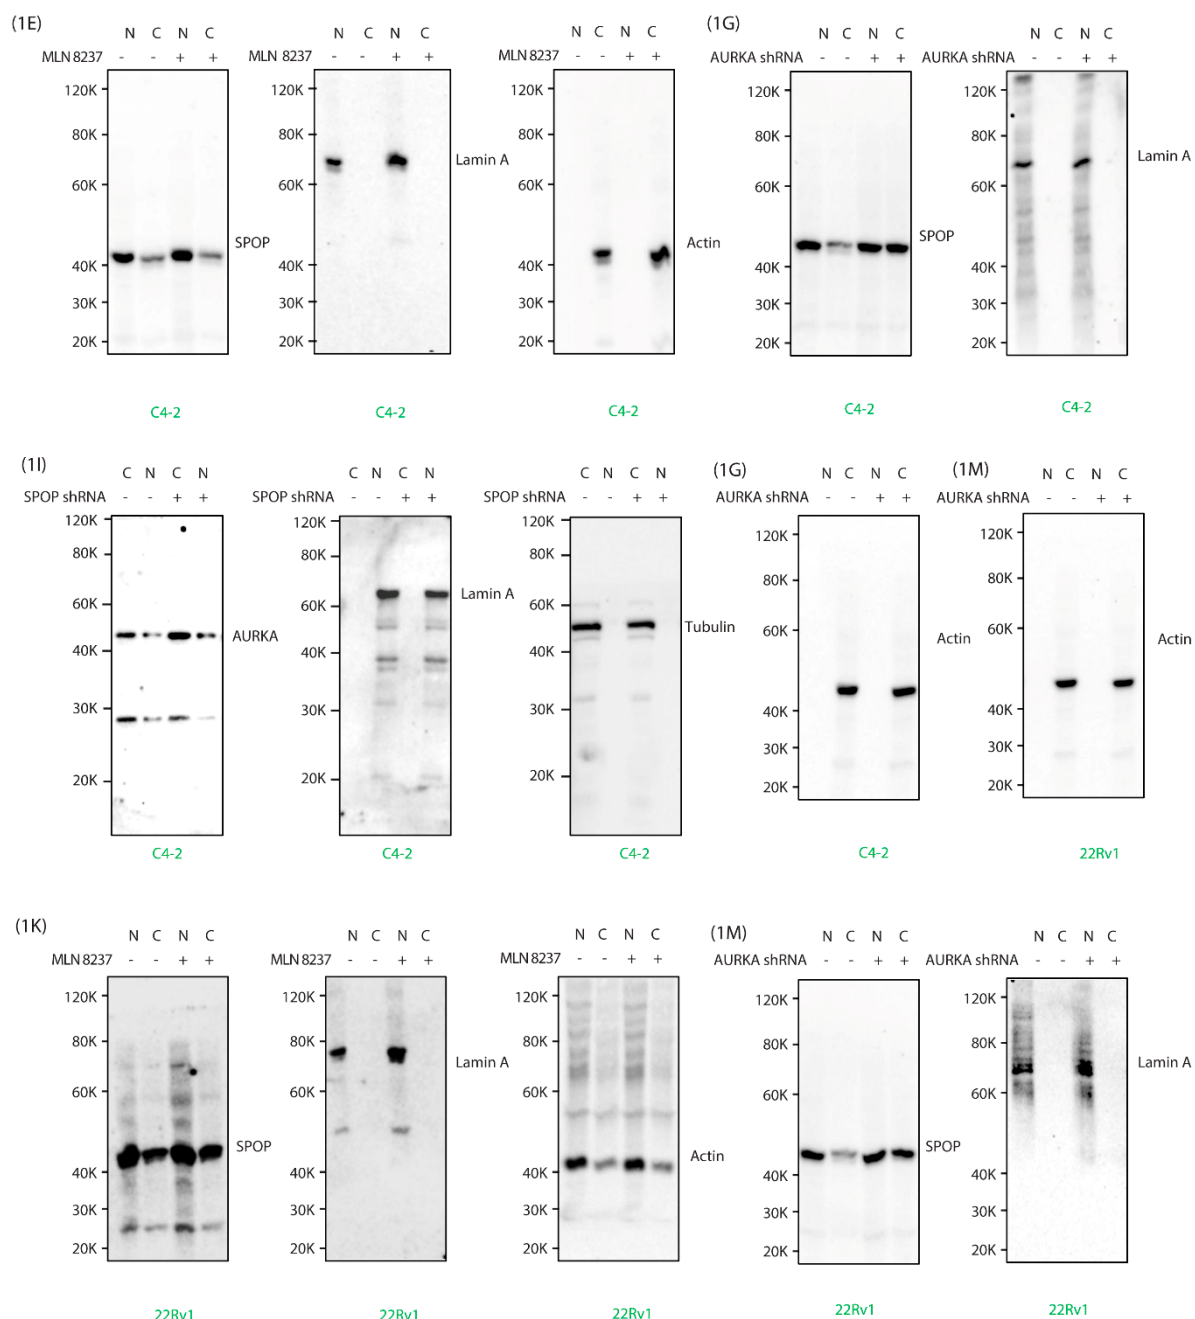

**Figure S1.** (1E) Full length western blot images of SPOP, Lamin A and Actin from fractionated lysates of vector and MLN8237-treated C4-2 cells. (1G) Full length western blot images of SPOP, Lamin A and Actin from fractionated lysates of scrambled and AURKA shRNA-treated C4-2 cells. (1I) Full length western blot images of AURKA, Lamin A and Tubulin from fractionated lysates of scrambled and SPOP shRNA-treated C4-2 cells. (1K) Full length western blot images of SPOP, Lamin A and

Actin from fractionated lysates of vector and MLN8237-treated 22Rv1 cells. (1M) Full length western blot images of SPOP, Lamin A and Actin from fractionated lysates of scrambled and AURKA shRNA-treated 22Rv1 cells.

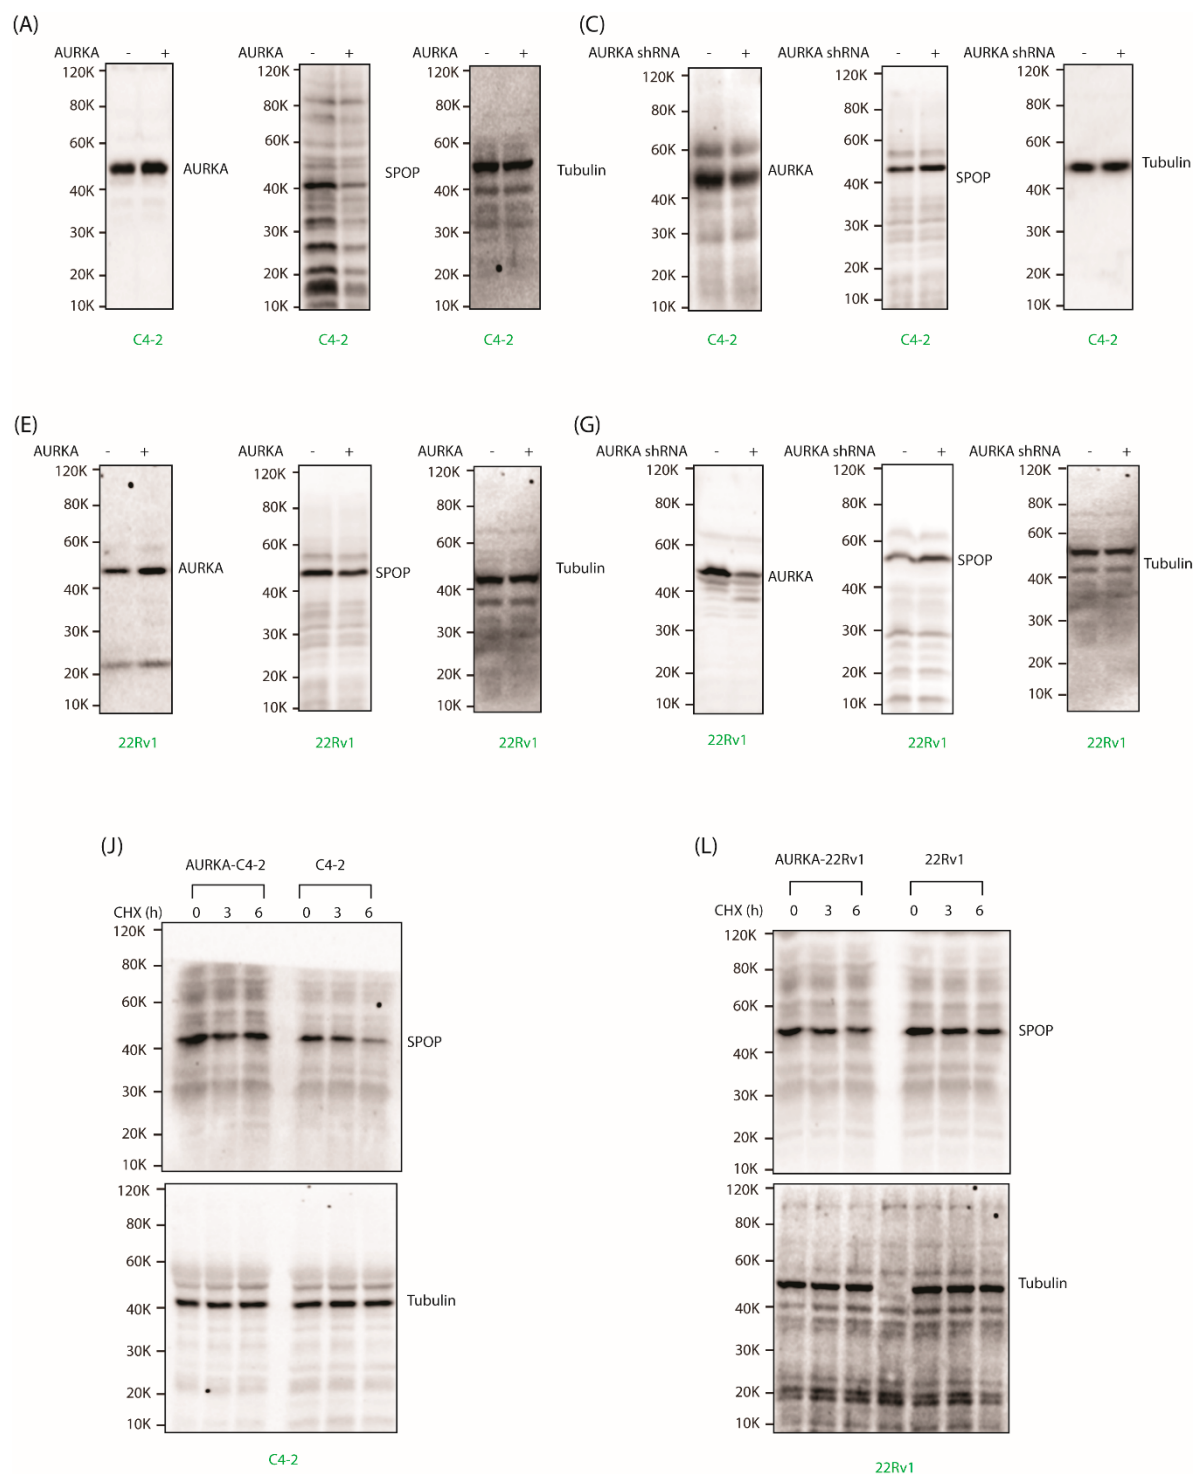

**Figure S2.** (2A) Full length western blot images of Figure 2A. (2C) Full length western blot images of Figure 2C. (2E) Full length western blot images of Figure 2E. (2G) Full length western blot images of Figure 2G. (2J) Full length western blot images of Figure 2J. (2L) Full length western blot images of Figure 2L.

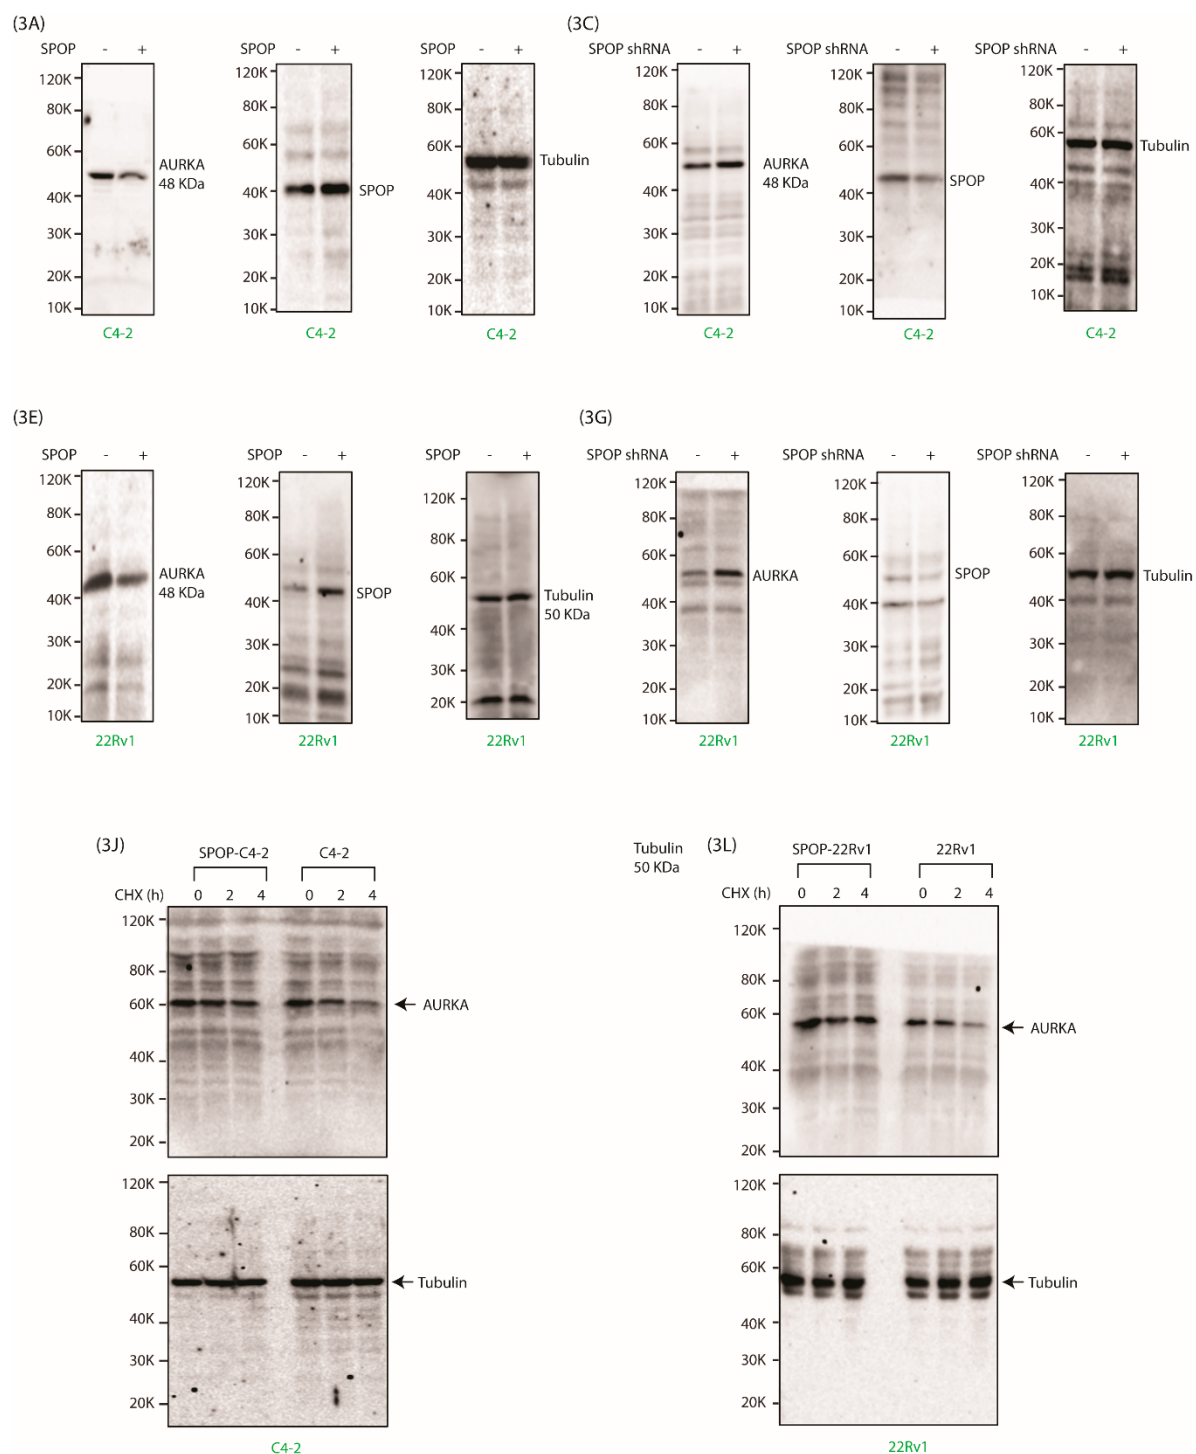

**Figure S3.** (3A) Full length western blot images of Figure 3A. (3C) Full length western blot images of Figure 3C. (3E) Full length western blot images of Figure 3E. (3G) Full length western blot images of Figure 3G. (3J) Full length western blot images of Figure 3J. (3L) Full length western blot images of Figure 3L.

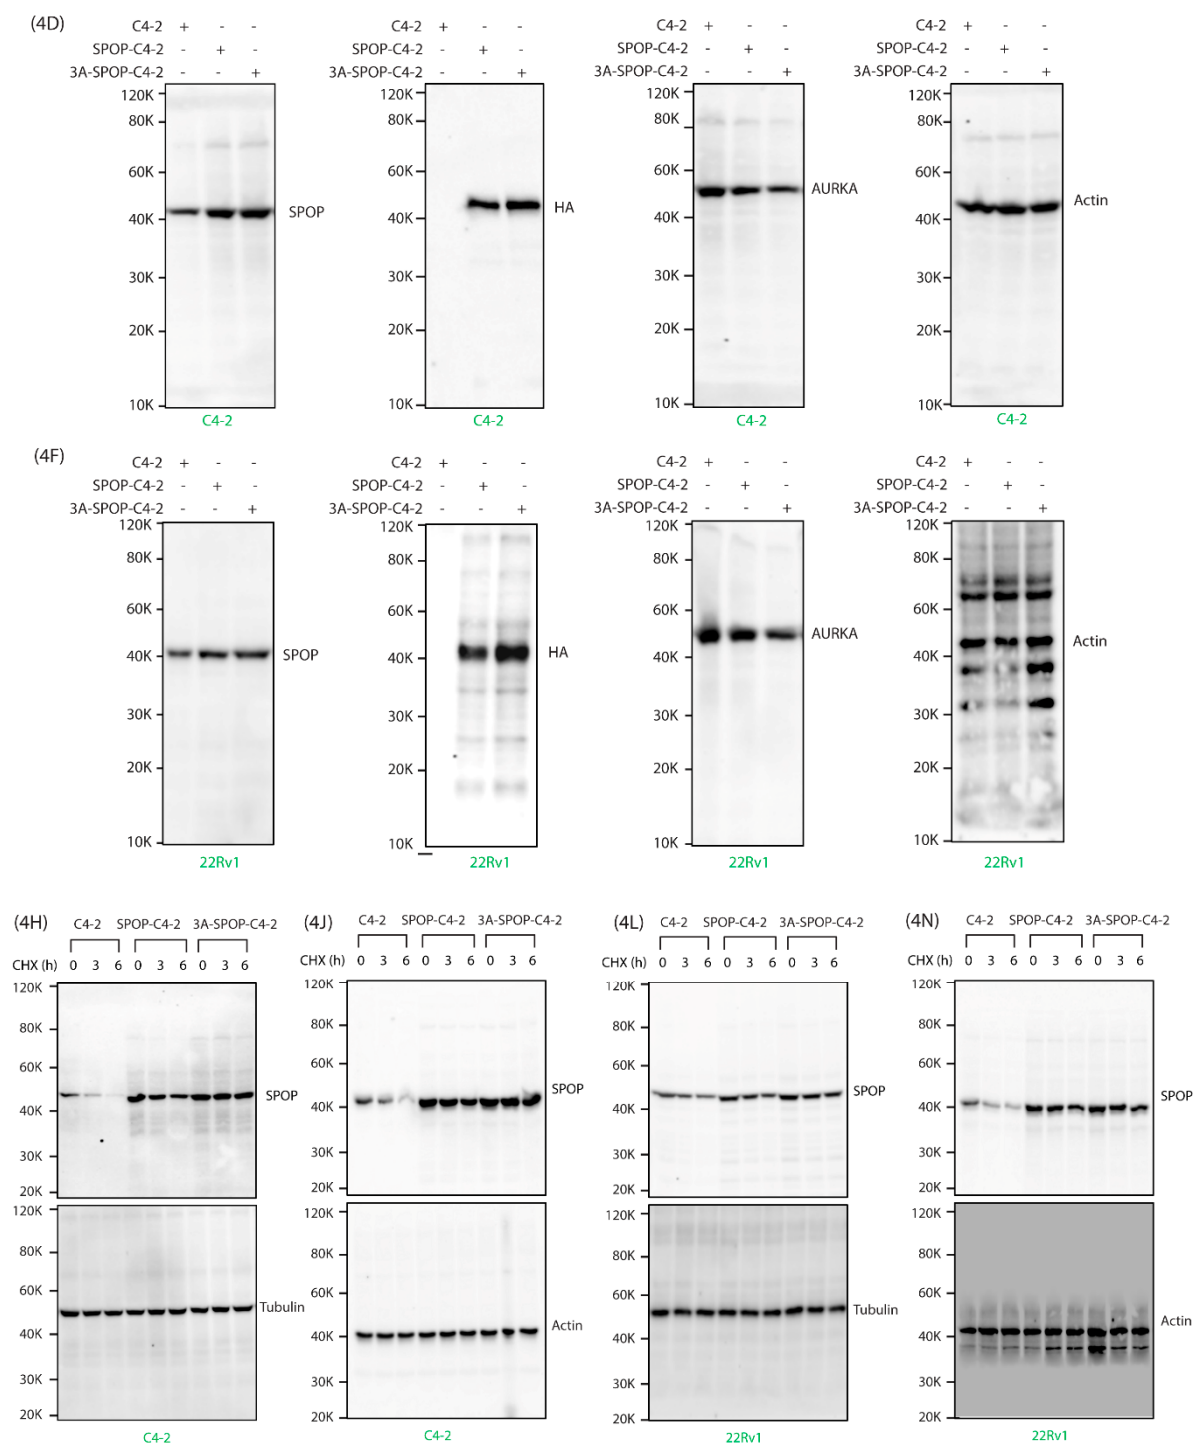

**Figure S4.** (4D) Full length western blot images of Figure 4D. (4F) Full length western blot images of Figure 4F. (4H) Full length western blot images of Figure 4H. (4J) Full length western blot images of Figure 4J. (4L) Full length western blot images of Figure 4L. (4N) Full length western blot images of Figure 4N.

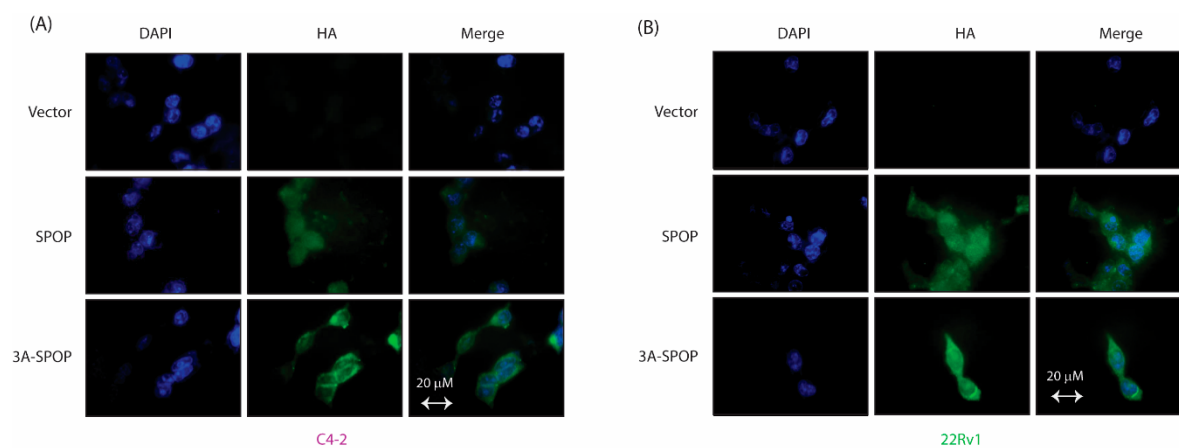

**Figure S5.** (5A) Immunofluorescence images assessing SPOP localization using HA expression in vector, SPOP-WT and SPOP 3A treated C4-2 cells. (5B) Immunofluorescence images assessing SPOP localization using HA expression in vector, SPOP-WT and SPOP 3A treated 22Rv1 cells.

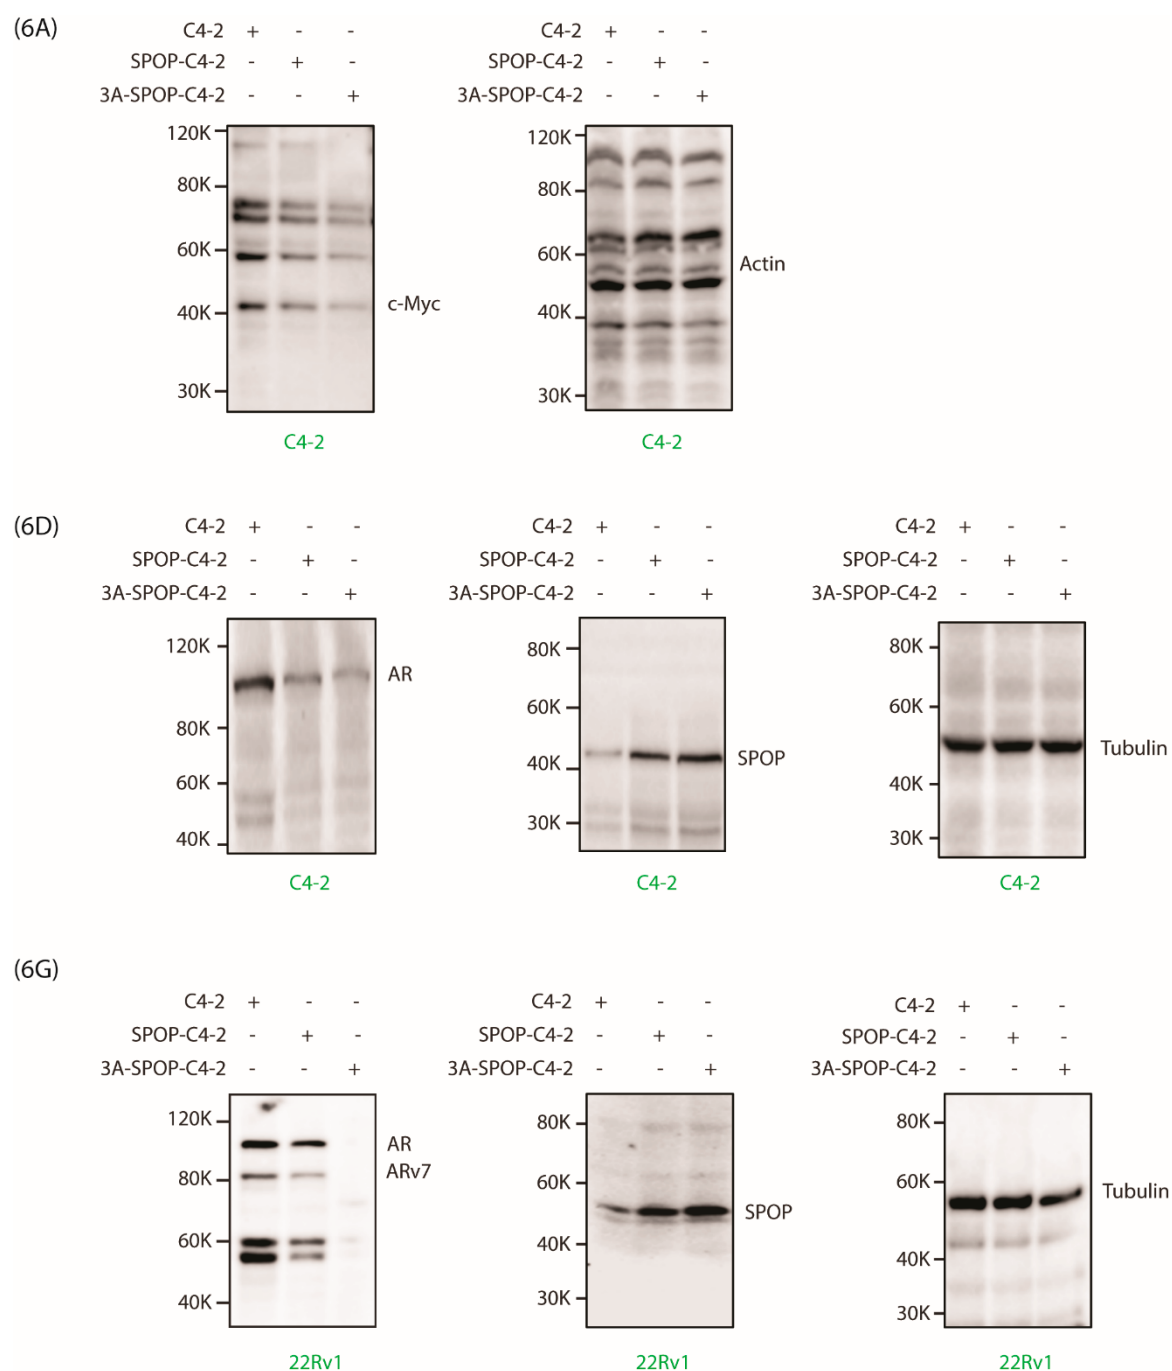

**Figure S6.** (6A) Full length western blot images of Figure 6A. (D) Full length western blot images of Figure 6D. (6G) Full length western blot images of Figure 6G.

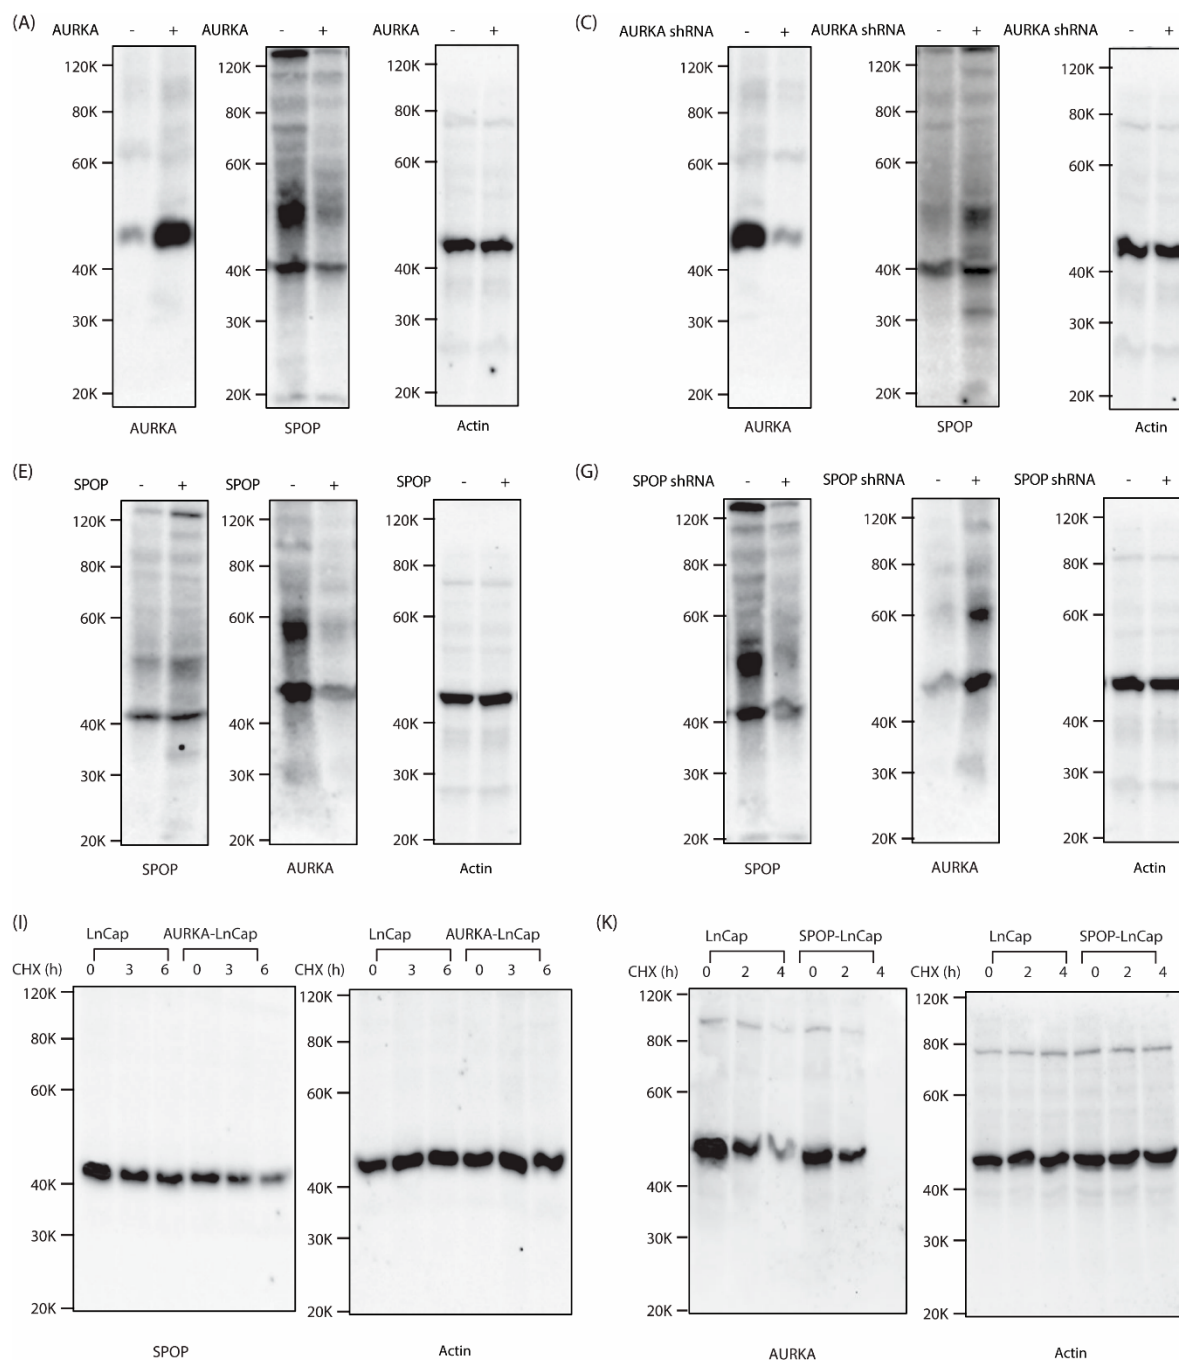

**Figure S7.** (7A) Full length western blot images of Figure 7A. (7C) Full length western blot images of Figure 7C. (7E) Full length western blot images of Figure 7E. (7G) Full length western blot images of Figure 7G. (7I) Full length western blot images of Figure 7I. (7K) Full length western blot images of Figure 7K.

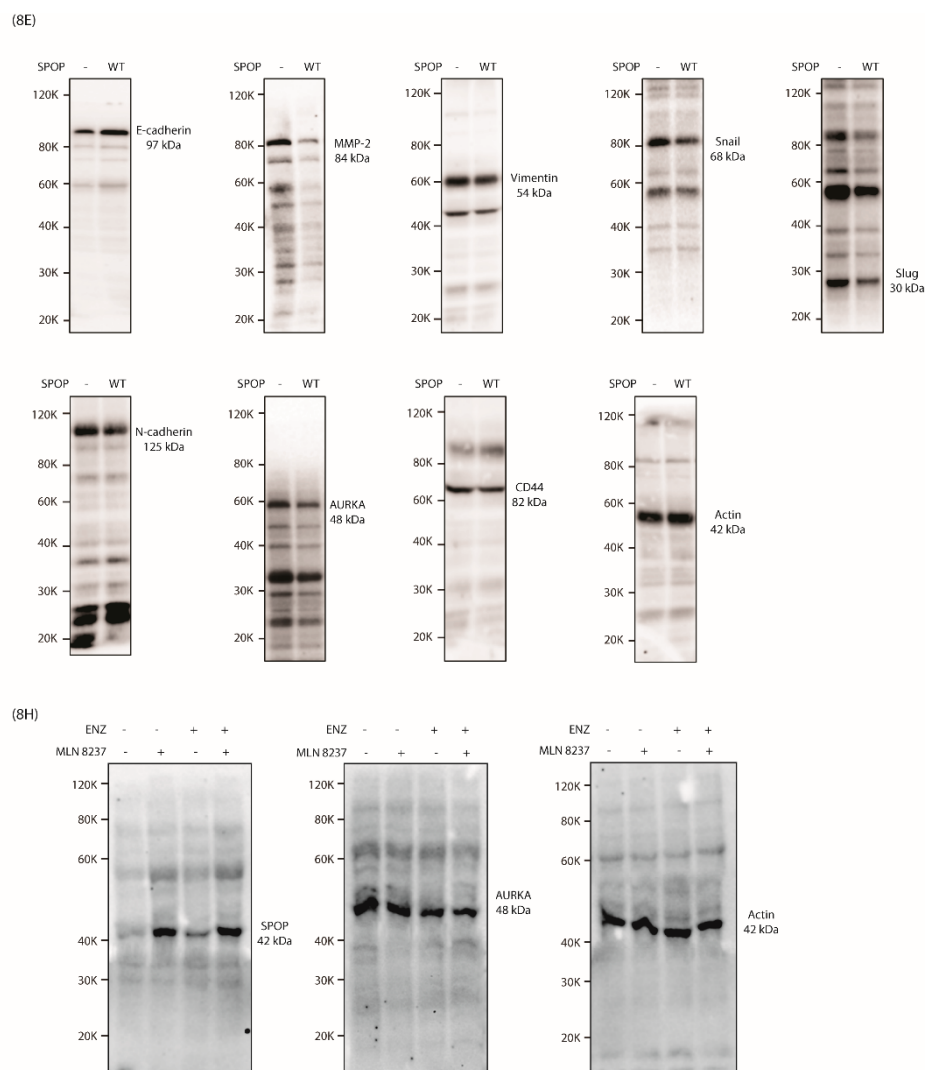

**Figure S8.** (8E) Full length western blot images of Figure 8E. (8H) Full length western blot images of Figure 8H.

**Table S1.** List of antibodies used in this study.

|    | Antibody   | Catalogue No. | Company             | RRID/Lot            |
|----|------------|---------------|---------------------|---------------------|
| 1  | AURKA      | SC-25425      | Santa Cruz Biotech  | RRID:AB_2061345     |
| 2  | Actin      | SC-8432       | Santa Cruz Biotech  | RRID:AB_626630      |
| 3  | Tubulin    | SC-8035       | Santa Cruz Biotech  | RRID:AB_628408      |
| 4  | SPOP       | SC-377206     | Santa Cruz Biotech  |                     |
| 5  | SNAIL      | PB9439        | Boster              | Lot#0931512DA859969 |
| 6  | SLUG       | PB9399        | Boster              | Lot#0931512DA859969 |
| 7  | N-Cadherin | PA1328        | One World Lab       | AB_10891323         |
| 8  | CD44       | PA1021        | One World Lab       | AB_10890445         |
| 9  | Vimentin   | SC-7558       | Santa Cruz Biotech  | RRID:AB_794002      |
| 10 | E-Cadherin | bs-10009R     | Bioss Inc           | Lot#9L18W1          |
| 11 | MMP-2      | bs-4599R      | Bioss Inc           | RRID:AB_11083963    |
| 12 | HA         | 12CA5         | Thermo Fisher       | RRID:AB_1958069     |
| 13 | 6x-His     | AB-1711       | Columbia Bioscience | Lot# PUR01016008    |
| 14 | AR         | SC-816        | Santa Cruz Biotech  | RRID:AB_1563391     |
| 15 | c-Myc      | SC-40         | Santa Cruz Biotech  | RRID:AB_627268      |
| 16 | Lamin-A    | SC-20680      | Santa Cruz Biotech  | RRID:AB_648148      |
| 17 | AURKA      | 14475         | Cell Signaling      | RRID:AB_2665504     |

**Table S2.** Sequence of SPOP shRNA.

|                      |                                                                                   |
|----------------------|-----------------------------------------------------------------------------------|
| SPOP shRNA (forward) | CCG GCT CCT ACA TGT GGA CCA TCA ACT CGA GTT GAT GGT<br>CCA CAT GTA GGA GTT TTT TG |
| SPOP shRNA (reverse) | AAT TCA AAA AGA GAA CCC TAA ACC ACA AGA TCT CGA GAT<br>CTT GTG GTT TAG GGT TCT C. |

**Table S3.** Sequences of real time qPCR primers.

| Name             | Primer Sequences              |
|------------------|-------------------------------|
| AURKA F          | 5'- CCACCTTCGGCATCCTAATA A-3' |
| AURKA R          | 5'- TCCAAGTGGTGCATATTCCA -3'  |
| SPOP F           | 5'- GGAAGGCTCCAAACCTCGACAA-3' |
| SPOP R           | 5'- AGCGTTCTCCACGGACAGGTTA-3' |
| $\beta$ -Actin F | 5'- CATGTACGTTGCTATCCAGGC -3' |
| $\beta$ -Actin R | 5'- CTCCTTAATGTCACGCACGAT -3' |
